# Supplementary material
Source: PubMed Central journal article supplement (PMC3563286)

supplemental figure 2

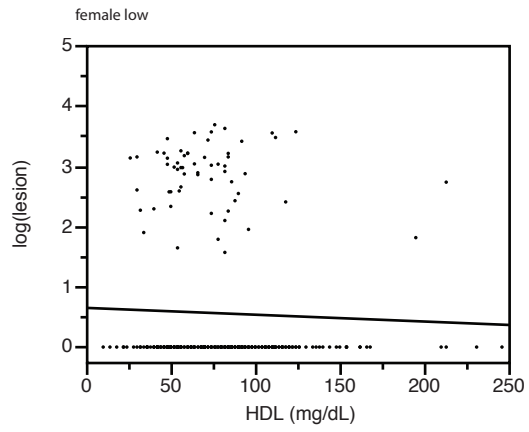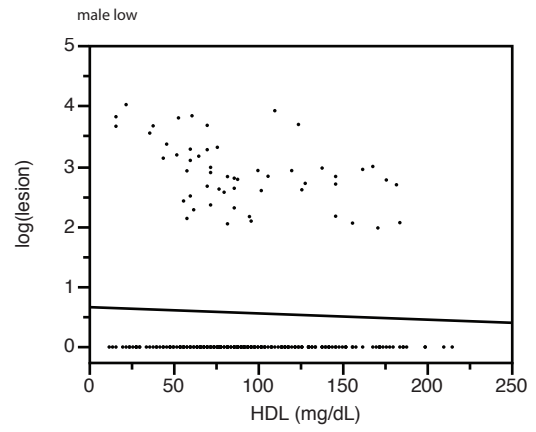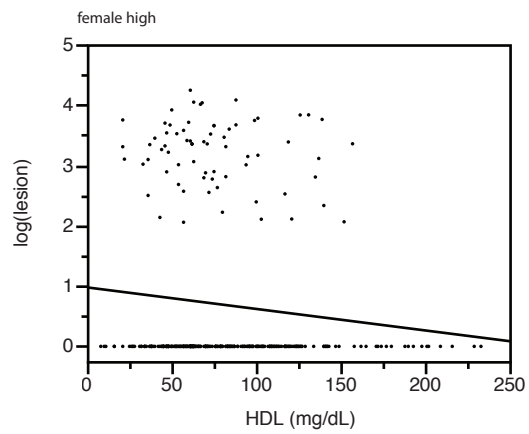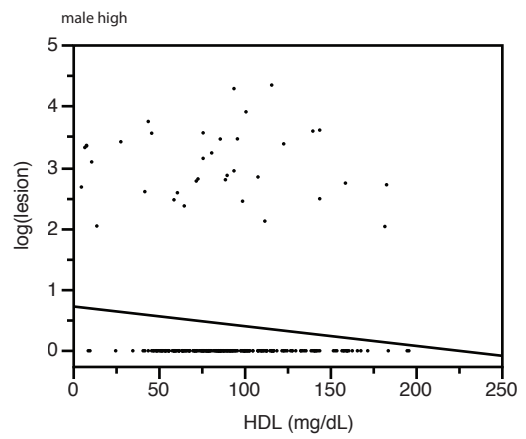

log(lesion)



Supplemental Material

supplemental figure II

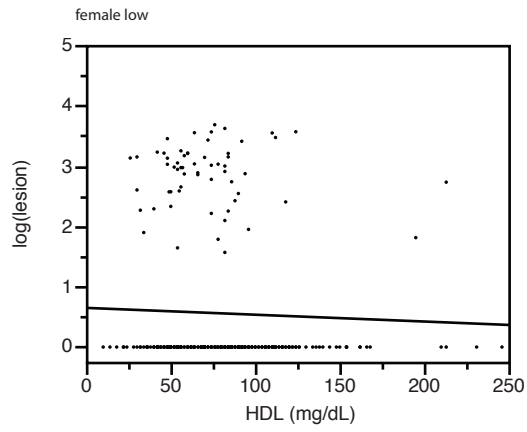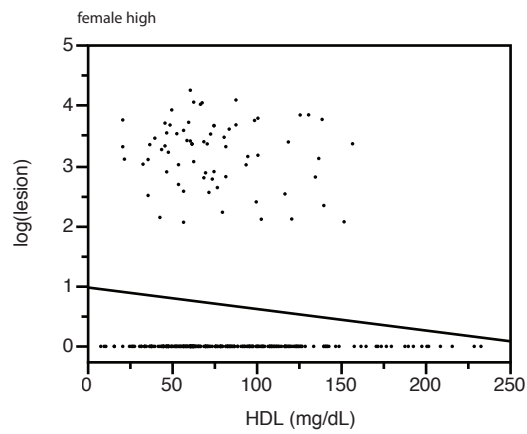

Supplement: NIHMS401657-supplement-01.pdf [file NIHMS401657-supplement-01.pdf]
